# Supplementary material for: NCAPG is a Potential Biomarker for Prognosis of Treatment in Children with High-risk Neuroblastoma
Source: Research Square preprint supplement (doi:10.21203/rs.3.rs-572272/v1), 2021-06-02
Supplement: Supplementary file 1 [file 1851ed4af33332dd1e308cc2.xlsx]

## Sheet: 工作表1
Table S4. tge miRNA sets that regulated the expression of six signature genes
BIRC5	CCNA2	KIF15	MELK	NCAPG	UBE2C
hsa-miR-300	hsa-miR-300	hsa-miR-300	hsa-miR-300	hsa-miR-300	hsa-miR-300
hsa-miR-381-3p	hsa-miR-381-3p	hsa-miR-381-3p	hsa-miR-381-3p	hsa-miR-381-3p	hsa-miR-381-3p
hsa-miR-495-3p	hsa-miR-495-3p	hsa-miR-495-3p	hsa-miR-495-3p	hsa-miR-495-3p	hsa-miR-495-3p
hsa-miR-641	hsa-miR-641	hsa-miR-641	hsa-miR-641	hsa-miR-641	hsa-miR-641
hsa-miR-15a-5p	hsa-miR-19a-3p	hsa-miR-24-3p	hsa-miR-21-5p	hsa-miR-15a-5p	hsa-miR-24-3p
hsa-miR-16-5p	hsa-miR-19b-3p	hsa-miR-27a-3p	hsa-miR-23a-3p	hsa-miR-16-5p	hsa-miR-33a-5p
hsa-miR-17-5p	hsa-miR-22-3p	hsa-miR-30a-5p	hsa-miR-101-3p	hsa-miR-23a-3p	hsa-miR-103a-3p
hsa-miR-20a-5p	hsa-miR-27a-3p	hsa-miR-129-5p	hsa-miR-105-5p	hsa-miR-33a-5p	hsa-miR-107
hsa-miR-21-5p	hsa-miR-29a-3p	hsa-miR-30c-5p	hsa-miR-181a-5p	hsa-miR-101-3p	hsa-miR-192-5p
hsa-miR-24-3p	hsa-miR-30a-5p	hsa-miR-30d-5p	hsa-miR-181b-5p	hsa-miR-197-3p	hsa-miR-215-5p
hsa-miR-27a-3p	hsa-miR-29b-3p	hsa-miR-139-5p	hsa-miR-181c-5p	hsa-miR-147a	hsa-miR-138-5p
hsa-miR-28-5p	hsa-miR-105-5p	hsa-miR-183-5p	hsa-miR-212-3p	hsa-miR-7-5p	hsa-miR-142-5p
hsa-miR-29a-3p	hsa-miR-199a-5p	hsa-miR-204-5p	hsa-miR-224-5p	hsa-miR-181a-5p	hsa-miR-149-5p
hsa-miR-31-5p	hsa-miR-208a-3p	hsa-miR-211-5p	hsa-miR-23b-3p	hsa-miR-181b-5p	hsa-miR-370-3p
hsa-miR-33a-5p	hsa-miR-129-5p	hsa-miR-216a-5p	hsa-miR-132-3p	hsa-miR-181c-5p	hsa-miR-337-3p
hsa-miR-93-5p	hsa-miR-148a-3p	hsa-miR-217	hsa-miR-133a-3p	hsa-miR-182-5p	hsa-miR-485-5p
hsa-miR-96-5p	hsa-miR-30c-5p	hsa-miR-221-3p	hsa-miR-144-3p	hsa-miR-205-5p	hsa-miR-491-5p
hsa-miR-101-3p	hsa-miR-30d-5p	hsa-miR-222-3p	hsa-miR-186-5p	hsa-miR-214-3p	hsa-miR-520a-5p
hsa-miR-29b-3p	hsa-miR-34a-5p	hsa-miR-223-3p	hsa-miR-194-5p	hsa-miR-216a-5p	hsa-miR-525-5p
hsa-miR-103a-3p	hsa-miR-199b-5p	hsa-miR-224-5p	hsa-miR-376c-3p	hsa-miR-219a-5p	hsa-miR-577
hsa-miR-106a-5p	hsa-miR-204-5p	hsa-miR-27b-3p	hsa-miR-369-3p	hsa-miR-200b-3p	hsa-miR-33b-5p
hsa-miR-107	hsa-miR-211-5p	hsa-miR-30b-5p	hsa-miR-377-3p	hsa-miR-15b-5p	hsa-miR-140-3p
hsa-miR-192-5p	hsa-miR-218-5p	hsa-miR-133a-3p	hsa-miR-382-5p	hsa-miR-23b-3p	hsa-miR-624-3p
hsa-miR-197-3p	hsa-miR-219a-5p	hsa-miR-135a-5p	hsa-miR-330-3p	hsa-miR-128-3p	hsa-miR-629-5p
hsa-miR-199a-3p	hsa-miR-224-5p	hsa-miR-126-5p	hsa-miR-323a-3p	hsa-miR-142-5p	hsa-miR-889-3p
hsa-miR-208a-3p	hsa-miR-200b-3p	hsa-miR-149-5p	hsa-miR-133b	hsa-miR-144-3p	hsa-miR-513b-5p
hsa-miR-10a-5p	hsa-miR-27b-3p	hsa-miR-186-5p	hsa-miR-485-3p	hsa-miR-134-5p	hsa-miR-1323
hsa-miR-10b-5p	hsa-miR-30b-5p	hsa-miR-30e-5p	hsa-miR-487a-3p	hsa-miR-146a-5p	hsa-miR-548o-3p
hsa-miR-34a-5p	hsa-miR-130a-3p	hsa-miR-370-3p	hsa-miR-494-3p	hsa-miR-150-5p	hsa-miR-1276
hsa-miR-181a-5p	hsa-miR-145-5p	hsa-miR-375	hsa-miR-181d-5p	hsa-miR-185-5p	hsa-miR-1197
hsa-miR-181b-5p	hsa-miR-152-3p	hsa-miR-382-5p	hsa-miR-518f-3p	hsa-miR-195-5p	hsa-miR-3127-5p
hsa-miR-181c-5p	hsa-miR-9-3p	hsa-miR-330-3p	hsa-miR-518b	hsa-miR-200c-3p	hsa-miR-4429
hsa-miR-182-5p	hsa-miR-150-5p	hsa-miR-135b-5p	hsa-miR-518c-3p	hsa-miR-369-3p	hsa-miR-6504-5p
hsa-miR-212-3p	hsa-miR-188-5p	hsa-miR-133b	hsa-miR-524-5p	hsa-miR-374a-5p
hsa-miR-214-3p	hsa-miR-320a	hsa-miR-345-5p	hsa-miR-520d-5p	hsa-miR-375
hsa-miR-215-5p	hsa-miR-200c-3p	hsa-miR-409-5p	hsa-miR-518a-3p	hsa-miR-378a-3p
hsa-miR-218-5p	hsa-miR-29c-3p	hsa-miR-409-3p	hsa-miR-518d-3p	hsa-miR-381-3p
hsa-miR-224-5p	hsa-miR-34c-5p	hsa-miR-498	hsa-miR-522-3p	hsa-miR-330-3p
hsa-miR-15b-5p	hsa-miR-301a-3p	hsa-miR-526b-5p	hsa-miR-505-3p	hsa-miR-323a-3p
hsa-miR-27b-3p	hsa-miR-130b-3p	hsa-miR-524-5p	hsa-miR-590-5p	hsa-miR-345-5p
hsa-miR-122-5p	hsa-miR-30e-5p	hsa-miR-520d-5p	hsa-miR-421	hsa-miR-384
hsa-miR-128-3p	hsa-miR-148b-3p	hsa-miR-522-3p	hsa-miR-425-5p	hsa-miR-422a
hsa-miR-130a-3p	hsa-miR-448	hsa-miR-513a-5p	hsa-miR-802	hsa-miR-424-5p
hsa-miR-132-3p	hsa-miR-429	hsa-miR-579-3p	hsa-miR-130a-5p	hsa-miR-448
hsa-miR-135a-5p	hsa-miR-449a	hsa-miR-582-5p	hsa-miR-140-3p	hsa-miR-429
hsa-miR-138-5p	hsa-miR-410-3p	hsa-miR-588	hsa-miR-889-3p	hsa-miR-409-3p
hsa-miR-140-5p	hsa-miR-524-5p	hsa-miR-656-3p	hsa-miR-944	hsa-miR-410-3p
hsa-miR-141-3p	hsa-miR-520d-5p	hsa-miR-340-5p	hsa-miR-513b-5p	hsa-miR-146b-5p
hsa-miR-143-3p	hsa-miR-516b-5p	hsa-miR-628-5p	hsa-miR-1323	hsa-miR-432-5p
hsa-miR-144-3p	hsa-miR-499a-5p	hsa-miR-450b-5p	hsa-miR-1286	hsa-miR-494-3p
hsa-miR-136-5p	hsa-miR-513a-5p	hsa-miR-889-3p	hsa-miR-548o-3p	hsa-miR-497-5p
hsa-miR-146a-5p	hsa-miR-508-3p	hsa-miR-875-5p	hsa-miR-1276	hsa-miR-181d-5p
hsa-miR-149-5p	hsa-miR-455-5p	hsa-miR-885-5p	hsa-miR-224-3p	hsa-miR-512-3p
hsa-miR-150-5p	hsa-miR-588	hsa-miR-665	hsa-miR-4262	hsa-miR-515-5p
hsa-miR-186-5p	hsa-miR-449b-5p	hsa-miR-543	hsa-miR-3617-5p	hsa-miR-519e-5p
hsa-miR-194-5p	hsa-miR-655-3p	hsa-miR-942-5p	hsa-miR-23c	hsa-miR-520f-3p
hsa-miR-195-5p	hsa-miR-454-3p	hsa-miR-944		hsa-miR-524-5p
hsa-miR-320a	hsa-miR-340-5p	hsa-miR-1298-5p		hsa-miR-520d-5p
hsa-miR-106b-5p	hsa-miR-488-3p	hsa-miR-1286		hsa-miR-520g-3p
hsa-miR-29c-3p	hsa-miR-589-5p	hsa-miR-1295a		hsa-miR-516b-5p
hsa-miR-200a-3p	hsa-miR-888-5p	hsa-miR-224-3p		hsa-miR-520h
hsa-miR-302a-3p	hsa-miR-885-5p	hsa-miR-2115-3p		hsa-miR-522-3p
hsa-miR-34b-5p	hsa-miR-877-5p	hsa-miR-3127-5p		hsa-miR-503-5p
hsa-miR-34c-5p	hsa-miR-301b-3p	hsa-miR-3140-3p		hsa-miR-513a-5p
hsa-miR-299-3p	hsa-miR-216b-5p	hsa-miR-3617-5p		hsa-miR-508-3p
hsa-miR-301a-3p	hsa-miR-208b-3p	hsa-miR-3619-5p		hsa-miR-514a-3p
hsa-miR-296-5p	hsa-miR-320b	hsa-miR-4428		hsa-miR-579-3p
hsa-miR-130b-3p	hsa-miR-320c	hsa-miR-1343-3p		hsa-miR-580-3p
hsa-miR-302b-3p	hsa-miR-1323	hsa-miR-4761-5p		hsa-miR-620
hsa-miR-302c-3p	hsa-miR-1286	hsa-miR-664b-3p		hsa-miR-33b-5p
hsa-miR-302d-3p	hsa-miR-548o-3p	hsa-miR-5688		hsa-miR-651-5p
hsa-miR-372-3p	hsa-miR-320d	hsa-miR-6509-3p		hsa-miR-653-5p
hsa-miR-373-3p	hsa-miR-2682-5p			hsa-miR-655-3p
hsa-miR-377-3p	hsa-miR-3145-3p			hsa-miR-656-3p
hsa-miR-381-3p	hsa-miR-3163			hsa-miR-758-3p
hsa-miR-330-3p	hsa-miR-4295			hsa-miR-671-5p
hsa-miR-342-3p	hsa-miR-3666			hsa-miR-802
hsa-miR-337-3p	hsa-miR-4662a-5p			hsa-miR-28-3p
hsa-miR-326	hsa-miR-4701-5p			hsa-miR-340-5p
hsa-miR-135b-5p	hsa-miR-4782-3p			hsa-miR-501-3p
hsa-miR-324-3p	hsa-miR-5009-3p			hsa-miR-502-3p
hsa-miR-338-3p	hsa-miR-5688			hsa-miR-532-3p
hsa-miR-335-5p	hsa-miR-506-5p			hsa-miR-589-5p
hsa-miR-384	hsa-miR-892c-5p			hsa-miR-624-3p
hsa-miR-424-5p	hsa-miR-6766-3p			hsa-miR-300
hsa-miR-20b-5p	hsa-miR-6835-3p			hsa-miR-450b-5p
hsa-miR-449a				hsa-miR-665
hsa-miR-329-3p				hsa-miR-873-5p
hsa-miR-452-5p				hsa-miR-543
hsa-miR-409-3p				hsa-miR-374b-5p
hsa-miR-485-5p				hsa-miR-942-5p
hsa-miR-490-3p				hsa-miR-944
hsa-miR-146b-5p				hsa-miR-513b-5p
hsa-miR-494-3p				hsa-miR-1295a
hsa-miR-496				hsa-miR-1269a
hsa-miR-497-5p				hsa-miR-1270
hsa-miR-181d-5p				hsa-miR-1276
hsa-miR-498				hsa-miR-1197
hsa-miR-520e				hsa-miR-2116-3p
hsa-miR-515-5p				hsa-miR-3118
hsa-miR-519c-3p				hsa-miR-378b
hsa-miR-520a-5p				hsa-miR-323b-3p
hsa-miR-520a-3p				hsa-miR-514b-3p
hsa-miR-519b-3p				hsa-miR-378c
hsa-miR-525-5p				hsa-miR-4306
hsa-miR-518f-3p				hsa-miR-3614-5p
hsa-miR-520b				hsa-miR-378d
hsa-miR-518b				hsa-miR-378e
hsa-miR-520c-3p				hsa-miR-378f
hsa-miR-518c-3p				hsa-miR-378h
hsa-miR-524-5p				hsa-miR-378i
hsa-miR-519d-3p				hsa-miR-4644
hsa-miR-520d-5p				hsa-miR-4676-3p
hsa-miR-520d-3p				hsa-miR-664b-3p
hsa-miR-518a-3p				hsa-miR-5590-3p
hsa-miR-518d-3p				hsa-miR-5691
hsa-miR-519a-3p				hsa-miR-1306-5p
hsa-miR-499a-5p
hsa-miR-503-5p
hsa-miR-513a-5p
hsa-miR-510-5p
hsa-miR-455-5p
hsa-miR-493-3p
hsa-miR-545-3p
hsa-miR-552-3p
hsa-miR-556-5p
hsa-miR-574-3p
hsa-miR-577
hsa-miR-579-3p
hsa-miR-590-5p
hsa-miR-620
hsa-miR-33b-5p
hsa-miR-642a-5p
hsa-miR-650
hsa-miR-449b-5p
hsa-miR-653-5p
hsa-miR-411-5p
hsa-miR-421
hsa-miR-542-3p
hsa-miR-425-5p
hsa-miR-758-3p
hsa-miR-454-3p
hsa-miR-199b-3p
hsa-miR-129-2-3p
hsa-miR-193a-5p
hsa-miR-361-3p
hsa-miR-362-3p
hsa-miR-330-5p
hsa-miR-532-3p
hsa-miR-455-3p
hsa-miR-589-5p
hsa-miR-616-3p
hsa-miR-624-3p
hsa-miR-541-5p
hsa-miR-876-5p
hsa-miR-708-5p
hsa-miR-744-5p
hsa-miR-877-5p
hsa-miR-665
hsa-miR-873-5p
hsa-miR-760
hsa-miR-301b-3p
hsa-miR-208b-3p
hsa-miR-942-5p
hsa-miR-1224-5p
hsa-miR-320b
hsa-miR-320c
hsa-miR-1323
hsa-miR-1271-5p
hsa-miR-1301-3p
hsa-miR-1287-5p
hsa-miR-1295a
hsa-miR-1251-5p
hsa-miR-548o-3p
hsa-miR-1270
hsa-miR-1276
hsa-miR-302e
hsa-miR-1252-5p
hsa-miR-1321
hsa-miR-320d
hsa-miR-1913
hsa-miR-449c-5p
hsa-miR-761
hsa-miR-3129-5p
hsa-miR-3139
hsa-miR-3619-5p
hsa-miR-3909
hsa-miR-3150b-3p
hsa-miR-3940-3p
hsa-miR-378g
hsa-miR-3173-5p
hsa-miR-3194-3p
hsa-miR-4676-3p
hsa-miR-4677-3p
hsa-miR-4739
hsa-miR-4756-5p
hsa-miR-4766-5p
hsa-miR-4784
hsa-miR-5047
hsa-miR-5688
hsa-miR-6512-3p
