# Supplementary material for: NCAPG is a Potential Biomarker for Prognosis of Treatment in Children with High-risk Neuroblastoma
Source: Research Square preprint supplement (doi:10.21203/rs.3.rs-572272/v1), 2021-06-02
Supplement: Supplementary file 2 [file 28a1bdb23244503c8b834c1e.docx]

**Table S1. Clinical information of neuroblastoma patients**

|  |  | GSE62564 | | GSE62564 | | Blood samples | |
| --- | --- | --- | --- | --- | --- | --- | --- |
| Clinical characteristics | | Total | % | Total | % | Total | % |
| Survival status | Survival | 329 | 78.52 | 43 | 56.58 | 29 | 80.56 |
|  | Death | 90 | 21.48 | 33 | 43.42 | 7 | 19.44 |
| Age at diagnosis | ≤18 | 236 | 56.32 | 36 | 47.37 | 23 | 63.89 |
|  | >18 | 183 | 43.68 | 40 | 52.63 | 13 | 36.11 |
| Gender | Male | 244 | 58.23 | 49 | 64.47 | 24 | 66.67 |
|  | Female | 175 | 41.77 | 27 | 35.53 | 12 | 33.33 |
